# Supplementary material for: Polygenic signal for symptom dimensions and cognitive performance in patients with chronic schizophrenia
Source: PubMed Central journal article supplement — Schizophr Res Cogn. 2018 Jan 28;12:11–9. doi: 10.1016/j.scog.2018.01.001 (PMC5852279; doi:10.1016/j.scog.2018.01.001), 2018-01-28
Supplement: mmc1.pdf [file mmc1.pdf]

Supplementary Table 1. PRS analyses of symptom variables, Model 1 with base covariates (age + sex+ 4 MDS components) across all SNP selection thresholds.

| Thres-<br>hold | No of<br>SNPs | Positive    |             |               | Negative       |              |               | Disorganized |       |        | Excited |       |         | Depressed |       |        |
|----------------|---------------|-------------|-------------|---------------|----------------|--------------|---------------|--------------|-------|--------|---------|-------|---------|-----------|-------|--------|
|                |               | $\beta$     | p-val       | R-sq          | $\beta$        | p-val        | R-sq          | $\beta$      | p-val | R-sq   | $\beta$ | p-val | R-sq    | $\beta$   | p-val | R-sq   |
| 5.00E-08       | 103           | 50.8        | 0.38        | 0.001         | -154.28        | 0.058        | 0.0049        | 63.05        | 0.109 | 0.0036 | 19.99   | 0.59  | 0.0004  | -6.07     | 0.887 | 0      |
| 1.00E-07       | 120           | 16.4        | 0.8         | 0             | <b>-180.49</b> | <b>0.047</b> | <b>0.0054</b> | 74.94        | 0.087 | 0.004  | 30.76   | 0.457 | 0.0008  | -9.02     | 0.849 | 0      |
| 1.00E-06       | 200           | 17.8        | 0.85        | 0.0001        | -137.36        | 0.297        | 0.0015        | 93.4         | 0.142 | 0.003  | -2.32   | 0.969 | 0.0001  | -35.29    | 0.609 | 0.0004 |
| 1.00E-05       | 391           | 17.1        | 0.91        | 0             | 56.15          | 0.781        | 0.00011       | 182.77       | 0.062 | 0.0048 | -25.54  | 0.781 | 0.0001  | -90.18    | 0.395 | 0.001  |
| 1.00E-04       | 903           | 74.7        | 0.78        | 0.0001        | 340.45         | 0.355        | 0.0012        | 331.38       | 0.062 | 0.0048 | 41.14   | 0.806 | 0.0001  | -247.22   | 0.199 | 0.0022 |
| 0.001          | 2237          | 197.8       | 0.65        | 0.0003        | 386.69         | 0.531        | 0.0005        | 279.39       | 0.349 | 0.0012 | 247.76  | 0.378 | 0.001   | -320.35   | 0.321 | 0.0013 |
| 0.01           | 6834          | 1204.6      | 0.15        | 0.0028        | 684.68         | 0.562        | 0.0005        | 602.04       | 0.291 | 0.0015 | 288.71  | 0.591 | 0.0004  | 248.13    | 0.688 | 0.0002 |
| 0.05           | 16217         | 2695.9      | 0.05        | 0.0054        | 2303.11        | 0.23         | 0.00198       | 1103.36      | 0.234 | 0.002  | 1020.17 | 0.243 | 0.0019  | -347.18   | 0.729 | 0.0002 |
| 0.1            | 23929         | 2840.9      | 0.11        | 0.0035        | 1763.02        | 0.479        | 0.0007        | 1376.58      | 0.253 | 0.0018 | 708.99  | 0.532 | 0.0005  | 337.69    | 0.796 | 0      |
| 0.2            | 35378         | 3983.6      | 0.09        | 0.0041        | 2472.34        | 0.449        | 0.0008        | 2473.28      | 0.117 | 0.0034 | 867.95  | 0.559 | 0.0005  | 824.8     | 0.629 | 0.0003 |
| 0.3            | 44267         | 5666.3      | 0.04        | 0.0058        | 3477.86        | 0.369        | 0.0011        | 3211.05      | 0.086 | 0.0041 | 512.44  | 0.771 | 0.00012 | 593.28    | 0.77  | 0.0001 |
| 0.4            | 51495         | 5996.8      | 0.06        | 0.005         | 4350.9         | 0.325        | 0.0013        | 3484.96      | 0.103 | 0.0037 | 814.41  | 0.686 | 0.00022 | -339.88   | 0.883 | 0      |
| 0.5            | 57724         | <b>7740</b> | <b>0.03</b> | <b>0.0067</b> | 6454.62        | 0.192        | 0.0023        | 4481.55      | 0.061 | 0.0049 | 733.22  | 0.745 | 0.00014 | -1110.88  | 668   | 0.0003 |

$\beta$  : Unstandardized coefficient; R-sq: variance explained

Supplementary Table 2. PRS analyses of symptom variables (Model 2 with base covariates [age + sex+ 4 MDS components] and neurocognition) across all SNP selection thresholds

| Threshold | SNPs  | Positive        |              |               | Negative        |              |               | Disorganized |       |        | Excited |       |        | Depressed |       |        |
|-----------|-------|-----------------|--------------|---------------|-----------------|--------------|---------------|--------------|-------|--------|---------|-------|--------|-----------|-------|--------|
|           |       | $\beta$         | p-val        | R-sq          | $\beta$         | p-val        | R-sq          | $\beta$      | p-val | R-sq   | $\beta$ | p-val | R-sq   | $\beta$   | p-val | R-sq   |
| 5.00E-08  | 103   | 330.26          | 0.079        | 0.0036        | -110.95         | 0.715        | 0.0002        | -3.24        | 0.978 | 0      | 202.83  | 0.121 | 0.0034 | -188.97   | 0.243 | 0.0021 |
| 1.00E-07  | 120   | 305.31          | 0.133        | 0.0027        | -100.23         | 0.76         | 0.0002        | -12.73       | 0.92  | 0      | 238.89  | 0.089 | 0.004  | -194.61   | 0.265 | 0.002  |
| 1.00E-06  | 200   | 446.52          | 0.095        | 0.0033        | -136.75         | 0.752        | 0.0002        | 21.01        | 0.9   | 0      | 163.99  | 0.38  | 0.0011 | -104.62   | 0.651 | 0.0003 |
| 1.00E-05  | 391   | 533.94          | 0.17         | 0.0022        | 323.28          | 0.606        | 0.0004        | 108.37       | 0.656 | 0.0002 | 284.63  | 0.293 | 0.0016 | 145.91    | 0.664 | 0.0003 |
| 1.00E-04  | 903   | <b>1786.27</b>  | <b>0.022</b> | <b>0.006</b>  | 1481.24         | 0.243        | 0.0021        | 232.47       | 0.639 | 0.0002 | 457.72  | 0.407 | 0.001  | -38.9     | 0.955 | 0      |
| 0.001     | 2237  | <b>2604.31</b>  | <b>0.026</b> | <b>0.0057</b> | 3573.38         | 0.059        | 0.0055        | 690.08       | 0.351 | 0.0009 | 143.15  | 0.862 | 0      | -467.42   | 0.648 | 0.0003 |
| 0.01      | 6834  | <b>5743.14</b>  | <b>0.013</b> | <b>0.007</b>  | 6033.44         | 0.108        | 0.004         | 194.92       | 0.894 | 0      | 945.32  | 0.564 | 0.0005 | 1740.12   | 0.389 | 0.0011 |
| 0.05      | 16217 | 6759.92         | 0.058        | 0.0042        | <b>11628.29</b> | <b>0.041</b> | <b>0.0063</b> | -151.38      | 0.946 | 0      | 2712.78 | 0.278 | 0.0017 | 3464.94   | 0.26  | 0.002  |
| 0.1       | 23929 | <b>10501.91</b> | <b>0.018</b> | <b>0.0064</b> | <b>20396.48</b> | <b>0.004</b> | <b>0.0123</b> | 1640.77      | 0.561 | 0.0003 | 2393.96 | 0.447 | 0.0008 | 6089.17   | 0.114 | 0.0039 |
| 0.2       | 35378 | <b>14315.41</b> | <b>0.019</b> | <b>0.0063</b> | <b>21515.42</b> | <b>0.029</b> | <b>0.0072</b> | 2167.26      | 0.577 | 0.0003 | 3649.86 | 0.4   | 0.001  | 8350.21   | 0.115 | 0.0039 |
| 0.3       | 44267 | <b>16131.68</b> | <b>0.033</b> | <b>0.0052</b> | <b>24430.87</b> | <b>0.044</b> | <b>0.0061</b> | 1764.74      | 0.712 | 0.0001 | 4489.5  | 0.4   | 0.001  | 7712.66   | 0.24  | 0.0022 |
| 0.4       | 51495 | <b>17415.23</b> | <b>0.048</b> | <b>0.0045</b> | <b>28618.41</b> | <b>0.043</b> | <b>0.0062</b> | 2443.58      | 0.66  | 0.0002 | 5480.15 | 0.376 | 0.0011 | 7002.87   | 0.359 | 0.0013 |
| 0.5       | 57724 | <b>21378.53</b> | <b>0.029</b> | <b>0.0055</b> | <b>35650.64</b> | <b>0.023</b> | <b>0.0078</b> | 3386.5       | 0.584 | 0.0003 | 5908.44 | 0.391 | 0.001  | 8079.93   | 0.342 | 0.0014 |

$\beta$ :Unstandardized coefficient; R-sq: variance explained;

Supplementary Table 3. Results of set based analysis for neurocognitive subdomains (p<0.05 with 10,000 permutations within each set)

| COGNITIVE PHENO-TYPES | LOCI                      | TOP VARIANT IN SET | P-VAL IN SET | BETA  | GENE                                                                          | RELEVANT BIOLOGICAL FUNCTION <sup>a</sup>                                                                                                                                                           |
|-----------------------|---------------------------|--------------------|--------------|-------|-------------------------------------------------------------------------------|-----------------------------------------------------------------------------------------------------------------------------------------------------------------------------------------------------|
| WORKING MEMORY        | chr7:131539263-131567263  | rs12706998         | 0.003        | 0.23  | *                                                                             |                                                                                                                                                                                                     |
|                       | chr8:60475469-60954469    | rs17269617         | 0.011        | -0.54 | *                                                                             |                                                                                                                                                                                                     |
|                       | chr15:40566759-40602237   | rs3784397          | 0.013        | 0.16  | <i>PLCB2</i> (1-phosphatidylinositol 4,5-bisphosphate phosphodiesterase beta) | G-protein coupled receptor binding signaling pathway, intracellular signal transduction; Involved with thyrotropin, oxytocin, WNT signaling, alpha adrenergic and 5HT2 receptor signaling pathways. |
|                       | chr1:243503719-244002945  | rs7551067          | 0.026        | 0.24  | <i>SDCCAG8</i> (Serologically defined colon cancer antigen 8)                 | Neuron migration                                                                                                                                                                                    |
|                       | chr2:149390778-149520178  | rs13026690         | 0.033        | -0.23 | <i>EPC2</i> (Enhancer of polycomb homolog 2)                                  | NA                                                                                                                                                                                                  |
|                       | chr11:124610007-124620147 | rs12278912         | 0.037        | 0.13  | <i>NRGN</i> (Neurogranin)                                                     | Calmodulin binding, signal transduction, nervous system development                                                                                                                                 |
|                       | chr1:149998890-150242490  | rs11205334         | 0.038        | -0.55 | <i>PLEKHO1</i> (Pleckstrin homolog domain containing family O member 1)       | NA                                                                                                                                                                                                  |
| VERBAL MEMORY         | chr8:60475469-60954469    | rs17269617         | 2e-04        | -0.75 | *                                                                             |                                                                                                                                                                                                     |
|                       | chr2:146416922-146441832  | rs10496985         | 0.009        | -0.29 | *                                                                             |                                                                                                                                                                                                     |
|                       | chr2:200161422-200309252  | rs17266097         | 0.13         | -0.20 | <i>SATB2</i> (DNA binding protein SATB2)                                      | Neuron migration, embryonic development                                                                                                                                                             |
|                       | chr20:37361494-37485994   | rs6100962          | 0.02         | 0.41  | *                                                                             |                                                                                                                                                                                                     |
|                       | chr2:193848340-194028340  | rs16824151         | 0.04         | 0.46  | *                                                                             |                                                                                                                                                                                                     |
|                       | chr2:146416922-146441832  | rs10496985         | 0.033        | -0.24 | *                                                                             |                                                                                                                                                                                                     |

|                               |                           |            |        |       |                                                                               |                                                                                                                                                                                                     |
|-------------------------------|---------------------------|------------|--------|-------|-------------------------------------------------------------------------------|-----------------------------------------------------------------------------------------------------------------------------------------------------------------------------------------------------|
| <b>REASON-<br/>ING</b>        | chr2:233559301-233753501  | rs1947105  | 0.042  | -0.16 | <i>GIGYF2</i> (PERQ amino acid rich with gyf domain containing protein 2)     | Neuromuscular process controlling balance; cell component of part of proximal dendrite                                                                                                              |
| <b>PROCESS-<br/>ING SPEED</b> | chr15:40566759-40602237   | rs3784397  | 0.015  | 0.155 | <i>PLCB2</i> (1-phosphatidylinositol 4,5-bisphosphate phosphodiesterase beta) | G-protein coupled receptor binding signaling pathway, intracellular signal transduction; Involved with thyrotropin, oxytocin, WNT signaling, alpha adrenergic and 5HT2 receptor signaling pathways. |
| <b>VIGILANCE</b>              | chr10:104423800-105165583 | rs999867   | 0.0113 | 0.36  | <i>WBP1L</i> (WW domain binding protein 1 like)                               | NA                                                                                                                                                                                                  |
|                               | chr15:84661161-85153461   | rs17841161 | 0.0191 | -0.68 | <i>EFTUD1P1</i>                                                               | NA                                                                                                                                                                                                  |
|                               | chr8:143309503-143330533  | rs10098073 | 0.0465 | -0.15 | <i>TSNARE1</i> (T-SNARE domain containing protein 1)                          | NA                                                                                                                                                                                                  |
|                               | chr2:149390778-149520178  | rs1348853  | 0.0475 | -0.24 | <i>EPC2</i> (Enhancer of polycomb homolog 2)                                  | NA                                                                                                                                                                                                  |
| <b>SOCIAL<br/>COGNITION</b>   | chr8:27412627-27453627    | rs17466684 | 0.0065 | -0.82 | <i>CLU</i> (Clusterin)                                                        | CCKR signaling map                                                                                                                                                                                  |
|                               | chr12:2321860-2523731     | rs11062160 | 0.0081 | -1.22 | <i>CACNA1C</i> (Voltage dependent L type calcium channel subunit alpha 1C)    | 5HT2, Alzheimer's disease amyloid secretase, Nicotinic acetyl choline receptor, oxytocin receptor signaling pathways                                                                                |
|                               | chr19:50067499-50135399   | rs2288920  | 0.0319 | 0.48  | <i>PRRG2</i> (Transmembrane gamma - carboxyglutamic acid protein 2)           | Immune system process, proteolysis, response to stimulus                                                                                                                                            |
|                               | chr1:149998890-150242490  | rs12073359 | 0.0498 | 0.66  | *                                                                             |                                                                                                                                                                                                     |

Highlight in bold are variants that survived Benjamini FDR correction ( $p < 0.05$ ) for multiple set comparisons; \*Intergenic variants; NA-information not available; a- a- Source: PANTHER database (<http://pantherdb.org>);
